# Supplementary material for: Structure of the methanol synthesis catalyst determined by in situHERFD XAS and EXAFS
Source: Royal Society of Chemistry journal article supplement (doi:10.1039/c1cy00277e), 2011-11-08
Supplement: c1cy00277e.pdf [file c1cy00277e.pdf]

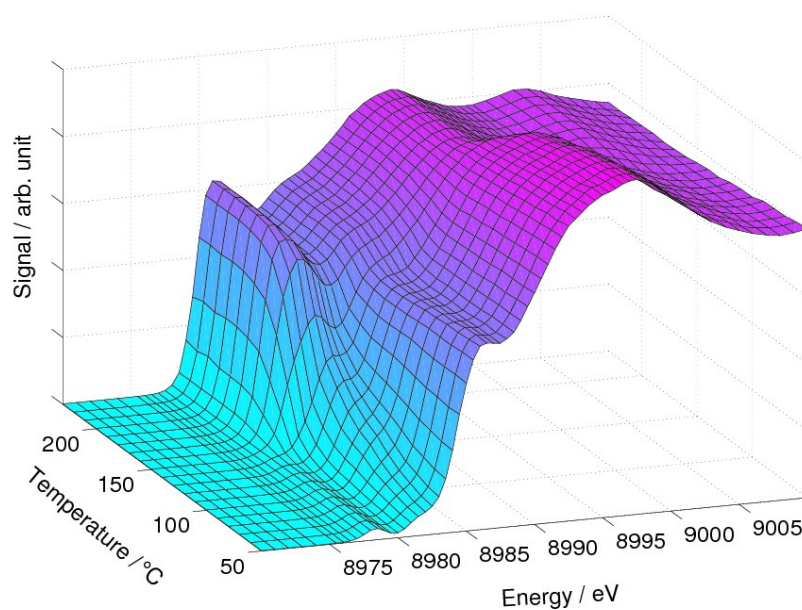

Evolution of Cu K-edge HERFD XAS during reduction of the catalyst precursor in the reaction mixture.

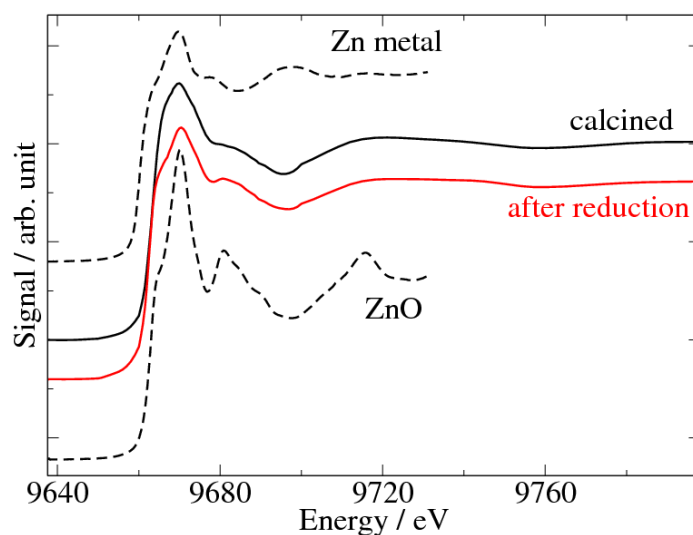

Zn K-edge XANES of the catalyst precursor before and after reduction in hydrogen. Spectra of Zn metal and ZnO are shown for comparison.

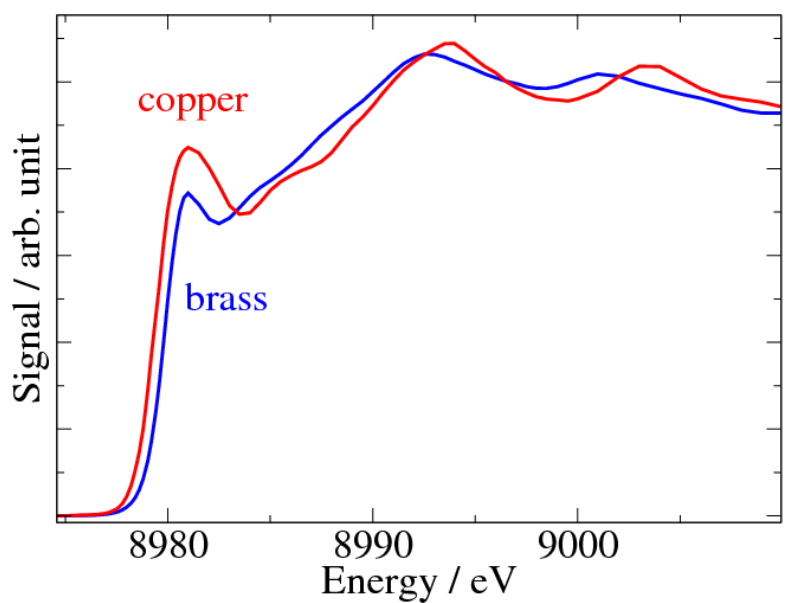

Cu K-edge HERFD XAS of copper metal and brass

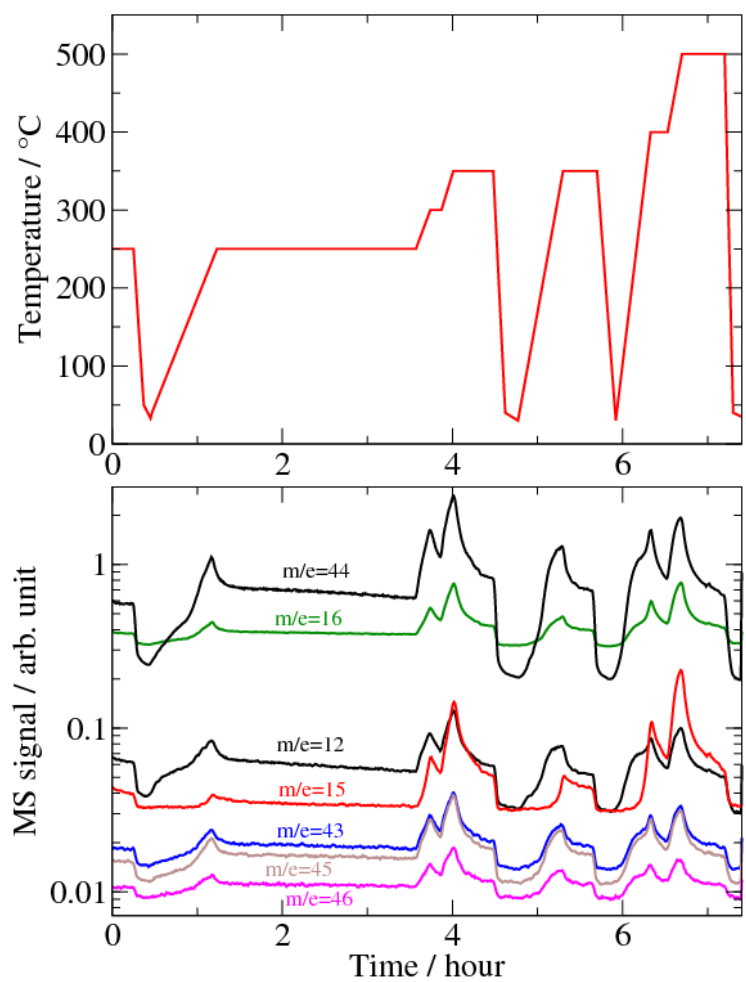

Temperature programmed desorption in argon, after the reaction.

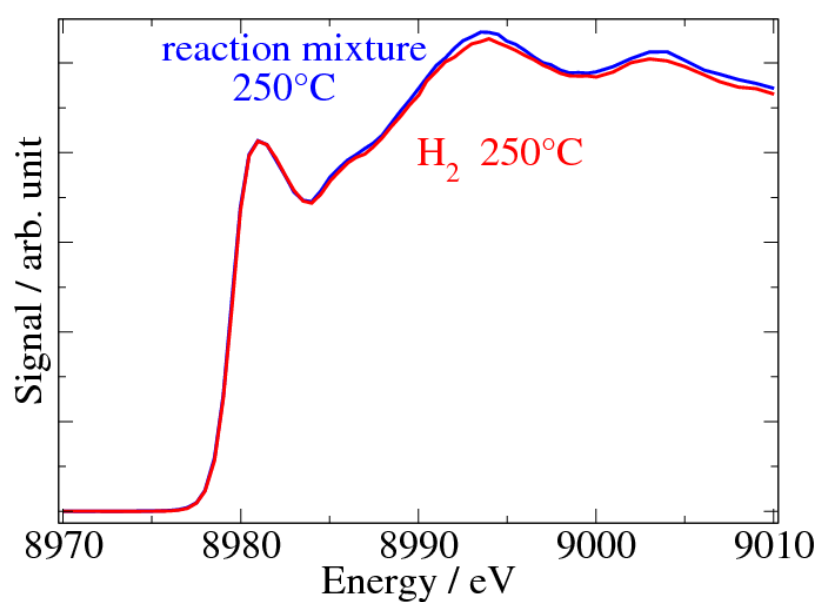

Cu K-edge HERFD XAS of the catalyst reduced in reaction mixture (blue) or hydrogen (red)
